1 **Title**

2 Extinction of COVID-19 Clusters in a Lebanese Village: A Quick, Adapted Molecular and  
3 Contact tracing

4 **Authors:**

5 Amanda Chamieh<sup>1,2</sup>, Rania Warrak<sup>3,4</sup>, Lucie Tawk<sup>4</sup>, Omar Zmerli<sup>2</sup>, Claude Afif<sup>2</sup>, Jean-Marc  
6 Rolain<sup>1</sup> and Eid Azar<sup>2\*</sup>

7 **Affiliations:**

- 8 1- Aix-Marseille Université, AP-HM, Institut de Recherche pour le Développement  
9 (IRD), Microbes Evolution Phylogeny and Infections (MEPHI), Institut Hospitalo-  
10 Universitaire Méditerranée-Infection, Marseille, France.  
11 2- Department of Infectious Diseases, Saint George Hospital University Medical Center,  
12 Beirut, Lebanon.  
13 3- Department of Ophthalmology, Saint George Hospital University Medical Center,  
14 Beirut, Lebanon  
15 4- Bcharreh Governmental Hospital, Bcharreh, Lebanon

16 **Declarations of Interest and Funding/Support Statement:**

17 This research did not receive any specific grant from funding agencies in the public,  
18 commercial, or not-for-profit sectors.

19 **\*Corresponding Author:**

20 Eid Azar, M.D.  
21 Infectious Disease, Chief of Staff  
22 Associate Chief Medical Officer for Safety, Risk Management, and Infection Prevention  
23 and Control  
24 Saint George Hospital University Medical Center, Youssef Sursock St. – Achrafieh,  
25 Beirut, Lebanon; [eeazar@stgeorgehospital.org](mailto:eeazar@stgeorgehospital.org); +961 03 665358  
26

27 **Keywords:** COVID-19 evolution, Test Trace and Isolate, SARS-CoV-2 heterogeneous  
28 transmission, SARS-CoV-2 cluster extinction, dispersion factor, molecular contact tracing

29

30 **Abstract (292 words)**

31 There is growing evidence of cluster transmission and superspreading of SARS-CoV-  
32 2, implying heterogeneous dispersion. We discuss the successful containment of COVID-19  
33 local outbreak in Bcharreh, the small town of 4500 inhabitants, in Northern Lebanon. We  
34 look at the dynamics of cluster transmission and viral load evolution throughout the outbreak.

35 SARS-CoV-2 PCR test was proposed to all exposed individuals. Persons under  
36 investigation that tested negative by PCR were periodically retested. We define: a cluster as  
37 more than 3 people with a common suspicious or confirmed SARS-CoV-2 positive contact,  
38 clinical cure as the resolution of symptoms, and virologic cure as SARS-CoV-2 PCR Cycle  
39 threshold(Ct) >35. We analyzed all obtained Ct into corresponding clusters and performed a  
40 time series analysis.

41 A total of 713/871 SARS-CoV-2 PCR tests were performed at Saint George Hospital  
42 University Medical Center (SGHUMC) from April 5<sup>th</sup> 2020 -June 14<sup>th</sup> 2020. We used the  
43 LightMix® Modular SARS-CoV-2 (COVID19) E, N, and RdRP-genes (Tib Molbiol, Berlin,  
44 Germany). Week one of epidemiologic surveillance began on March 31<sup>st</sup> when the first case  
45 was detected. A strict lockdown was imposed on Bcharreh village 5 days later, on top of the  
46 national lockdown. We identified 4 different clusters ranging from 3 to 27 cases and 3  
47 sporadic unrelated cases.

48 Almost 70% of each cluster was diagnosed within 7 days. After 2 weeks, we saw a  
49 significant increase in the average initial diagnostic Ct 27.9 to 34.72 (P<0.0001). A total of  
50 73/74 SARS-CoV-2 PCR positive individuals achieved cure (98.6%). We recorded one death  
51 of a 90-year-old man with multiple comorbidities.

52 In explosive new epidemics, we can derive from previous experience and not be  
53 blinded by it. To safely navigate out of the lockdown, focus on where new transmission is  
54 likely to emerge and accordingly target available diagnostic technologies.

55

56

57 **Text (2552 words)**

58 **Introduction**

59 The COVID-19 pandemic overwhelmed healthcare systems worldwide with  
60 thousands of cases diagnosed daily(1). We all became acquainted with the basic reproduction  
61 number  $R_0$ , which is a calculation of the average number of secondary transmissions caused  
62 by a single primary case in a fully susceptible population(2).

63 According to Lloyd-Smith(3) and the London School of Hygiene and Tropical  
64 Medicine COVID-19 Working Group(4), a population estimate of  $R_0$  would underestimate  
65 the high degree of individual level variation or overdispersion in the distribution of COVID-  
66 19. Based on the globally estimated  $R_0$  of 2-3(5,6), the overdispersion parameter  $k$  was  
67 estimated at 0.1. This suggests that 80% of secondary transmission is caused by around 10%  
68 of infectious individuals. In Hong Kong, 20% of cases were responsible for 80% of the local  
69 transmission, and  $k$  was estimated at around 0.45 (7) . Some countries such as Iran, Italy,  
70 Spain and France saw a devastating surge of locally transmitted cases where epidemiologic  
71 link was no longer traceable(8). Other countries that also saw imported cases of COVID-19  
72 had much less transmissions than expected if the  $R_0$  of 2-3 was accurate.

73 This growing evidence in support of cluster transmission and superspreading of  
74 SARS-CoV-2 implies that dispersion of the disease is heterogeneous. An analysis of Japanese  
75 contact tracing of COVID-19 confirmed patients identified 61 clusters, with clusters reaching  
76 more than 100 individuals, related to only 22 index cases (9). Thus, early outbreaks models  
77 should account for the proportion of cases that do not transmit as well as  $R_0$  to properly  
78 estimate individual variation in infectivity.

79 According to known outbreak report models, the number of expected cases in  
80 Lebanon, from February 21<sup>st</sup> when the first imported case was confirmed, was 600,000  
81 individuals within 2-3 months and at least 1500 deaths(10). This did not reflect the observed  
82 reality of cluster transmission. Lebanon is a small country of 10,452 km<sup>2</sup> with 6.9 million  
83 inhabitants with tightly knit societies that played a major role in successful contact tracing.  
84 We discuss the successful containment of COVID-19 local outbreak in Bcharreh, the small  
85 town of 4500 inhabitants, in Northern Lebanon. We look at the dynamics of cluster  
86 transmission and viral load evolution throughout the outbreak.

### 87 **The Study**

88 In Lebanon, the first diagnosed case in February 21 2020 led to a gradual lockdown of  
89 the country, prohibiting all gatherings by mid-March 2020. According to Ministry of Public  
90 Health (MOPH), since SARS-CoV-2 was declared a Public Health Emergency of  
91 International Concern (PHEIC), Lebanon built a capacity for 576 hospital beds, 234 ICU  
92 beds and 263 ventilators.

93 One of the pillars of Lebanese Response Plan was mobilizing municipalities, mayors  
94 and creating local resources and networks for contact tracing. Disparity of healthcare system  
95 is apparent with many underserviced public governmental hospitals and major university  
96 hospital centers located in center of Beirut(11). Luckily, in the construct of Lebanese society,  
97 this implies that a community or municipality is totally traceable. The urgency of the  
98 situation created an initiative for small villages to perform thorough contact tracing and show  
99 up for testing. The citizens of this town waived privacy concerns and the contact tracing was  
100 transparent.

101 SARS-CoV-2 PCR testing was divided among different public and private testing  
102 centers in an effort to rapidly test and contain all persons under investigation. The major  
103 proportion of testing was conducted at our Saint George Hospital University Medical Center  
104 (SGHUMC) Clinical Laboratories starting April 5<sup>th</sup> 2020 until June 14<sup>th</sup> 2020.

105 We use the LightMix® Modular SARS-CoV-2 (COVID19) E, N, and RdRP-genes  
106 (Tib Molbiol, Berlin, Germany) as previously described(12). The cycle number threshold  
107 values (Ct) is a reflection of quantifiable SARS-CoV-2. A higher Ct confers a lower quantity  
108 of SARS-CoV-2.

109 Week one of epidemiologic surveillance began on March 31<sup>st</sup> when the first case was  
110 detected. By April 5<sup>th</sup>, another 10 cases appeared. A decision was taken by the local corona  
111 response team to perform a very thorough contact tracing. A strict lockdown was imposed on  
112 Bcharreh 5 days later, on top of the national lockdown. This meant that neither entry nor exit  
113 of the town was allowed, ensuring no new imported cases, and that all commerce was shut  
114 down.

115 We proposed performing a PCR-based test on all the exposed individuals and their  
116 families regardless of symptoms development. All the individuals were screened and  
117 followed up daily. Each positive individual had at least one follow-up PCR test. We  
118 continued periodic screening and testing for individuals with positive contacts yet tested  
119 negative.

120 We define: (1) a cluster as more than 3 people with exposure to a common suspicious  
121 or confirmed SARS-CoV-2 positive contact, (2) clinical cure as the resolution of symptoms,  
122 (3) virologic cure as obtaining a SARS-CoV-2 PCR with a Ct>35, implying no infectivity  
123 (13,14). We analyzed retrospectively all obtained Ct into their corresponding clusters and  
124 performed a time series analysis.

## 125 **Results**

126 A total of 871 PCR tests were performed on the traced contacts of the town of  
127 Bcharreh, with 713 in our laboratories at SGHUMC. A total of 74 individuals were SARS-  
128 CoV-2 PCR positive. Seventy-three out of seventy-four achieved clinical and virologic cure,  
129 at 98.6%. Results at SGHUMC are available for 67 out of 74 diagnosed. There was only one  
130 death of a 90-year-old man with multiple comorbidities.

131 We managed to diagnose 65% (43/67) of the COVID-19 cases in the first  
132 epidemiologic week. In week 2, 4 new cases diagnosed (5.9%). In week 3, 9 new cases  
133 (13.4%). In week 4, 1 new case (1.49%). In week 5, 7 cases diagnosed (10.4%). In week 6, 1  
134 case diagnosed (1.49%). In week 7, 2 new cases diagnosed (2.9%).

135 The average initial diagnostic cycle threshold (iCt) gradually increases throughout the  
136 study period. We start at an iCt of 27.5 in weeks 1 and 2. In week 3, the average iCt increases  
137 to 30.7. In week 4-5, the average iCt increases to 34.25. In weeks 6-7 the average iCt is at 32.  
138 The time series analysis showed a significantly increasing trend of iCt, and specifically  
139 beyond the date of April 22, 2020, in epidemiologic week 3, from which the average Ct shifts  
140 from 27.9 to 34.72 ( $p < 0.0001$ ) (Figure 1).

141

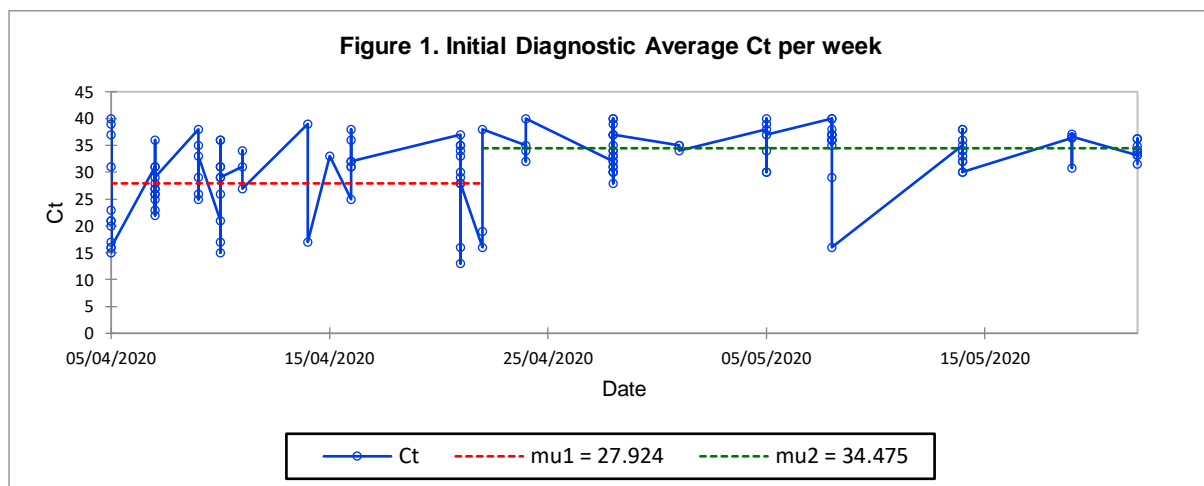

142

### 143 **Cluster Transmission:**

144 Following the contact tracing that was performed we identified 4 different clusters  
145 and a group of sporadic unrelated cases. Three sporadic cases appeared in weeks 2, 4 and 7,  
146 at iCt of 17, 35, and 31, respectively. The cluster sizes ranged from 3 to 27 cases. In week 1,  
147 3 clusters were traced, H, T and L. A cluster G appeared in week 3 with possible  
148 epidemiologic linkage to clusters L and H.

149 Cluster H is related to a common healthcare related exposure, totaling 8 cases of  
150 which 5/8 (63%) were diagnosed in week 1. In week 2, 2 cases were diagnosed while in week

151 3 the last one. Cluster H had an average iCt of 29.8 in week 1, which increased to 34 in week  
152 2 and 3. No statistically significant trend was detected in this cluster.

153 Cluster T is one main family exposure with different households that had one index  
154 case. This cluster totaled 27 cases, of which 19/27(70%) were diagnosed within 1 week. In  
155 week 2, there was one new case at an average Ct of 31. We diagnosed 3 cases in each of  
156 weeks 3 and 5 at an average iCt of 31.7 and 35, respectively. In week 7, one case was  
157 diagnosed at iCt of 33. Time series analysis showed a significantly increasing trend of  
158 average iCt ( $p < 0.00001$ ).

159 Cluster L is 4 different intertwined families with different households with the same  
160 common exposed individuals. This cluster totaled 24 cases, of which 19/24 (79%) were  
161 diagnosed in week 1 at an average iCt of 29. In week 3, 1 case was diagnosed at an iCt of 35.  
162 In week 5, 3 cases were diagnosed at an average iCt of 32. In week 6, the last case was  
163 diagnosed at an average iCt of 32. Time series analysis did not detect any trend in this cluster.

164 Cluster G is a family with relations to cluster L and contact with cluster H yet  
165 epidemiologic linkage was no longer fully traceable. This cluster is composed of 5  
166 individuals, 4 (80%) of which were diagnosed in epidemiologic week 3 at an average iCt of  
167 22.25. In the first week of appearance of this cluster, 80% of the cases were diagnosed. The  
168 last case was diagnosed in week 5 at iCt of 16. There was no trend detected in this series.

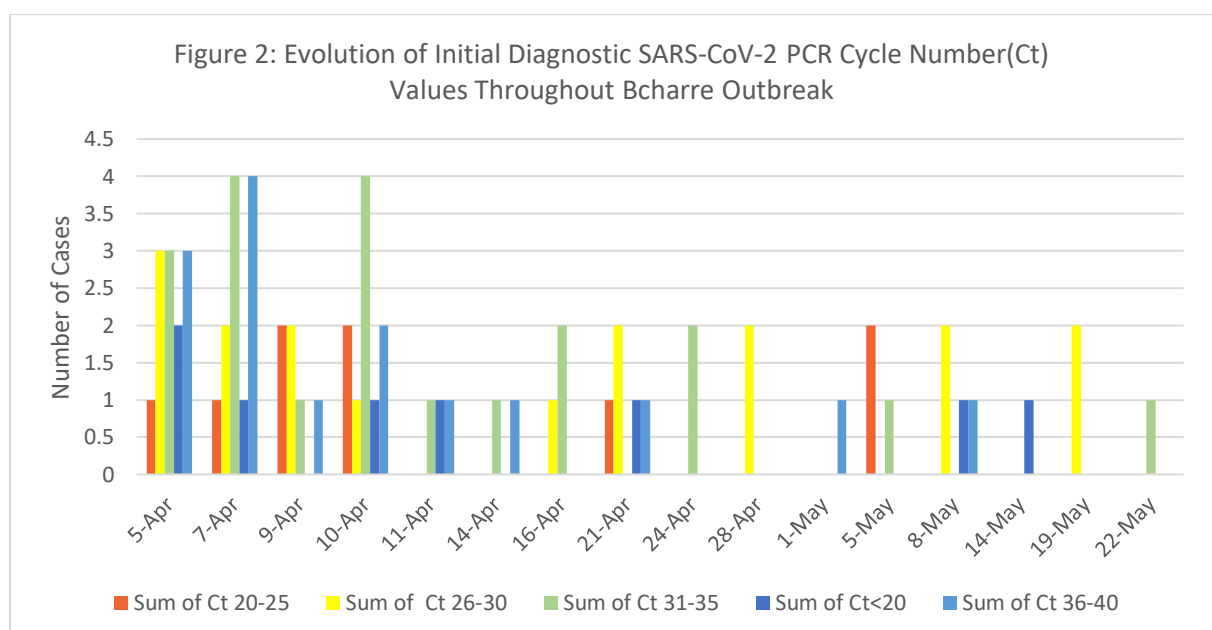

169

## 170 **Discussion/Interpretations**

171           When a novel pathogen is encountered, we do not yet know the role of individual  
172 variation on transmission. This may explain why we observe a significant discrepancy  
173 between reality and the mathematical model based on global population-wide estimation of  
174  $R_0$ . Following the example of the Chinese government, several countries opted for extreme  
175 social distancing, national and international lockdown, and quarantine of suspicious and  
176 confirmed cases. Soon enough, the world was in a global lockdown as an attempt to stop the  
177 spread of COVID-19(15,16).

178           Containment of cases in small countries with smaller towns and villages appeared to  
179 be easier in some communes such as Ferrera Erbognone in the Province of Pavia in the  
180 Italian region Lombardy, located about 45 km southwest of Milan, and Zahara de La Sierra in  
181 southern Spain. There are around 1500-2000 inhabitants in both these towns. They applied a  
182 strict lockdown and recorded zero cases of COVID-19(17,18).

183           This is similar to our described case of Bcharreh where 4 clusters were closely  
184 followed, and all contacts were traced molecularly. The investigative, intrusive nature of  
185 neighborly interactions facilitated a smooth and comprehensive contact tracing and  
186 subsequent SARS-CoV-2 PCR testing of all contacts, resulting in extinction of all COVID-19  
187 cluster within 8 weeks.

188           The common limitation in facing emerging pathogens such as SARS-CoV-2 is the  
189 unknown epidemiologic characteristics and transmissibility that may impede and complicate  
190 effective control strategies. More than often, this leads to delays in proper management and  
191 an overwhelmed healthcare system. The various proposed mathematical models and  
192 projections may be misleading and far from real life empiric experience. Most models for  
193 SARS-CoV-2 were based on assumptions from the 1918 Flu pandemic, which we know  
194 follows a homogenous transmission with a dispersion factor  $k$  of 1. This means that clusters  
195 had very little role in the 1918 Flu pandemic, contradicting the transmission pattern of the  
196 current COVID-19 pandemic(3,19).



197 We also know that the higher the proportion of non-transmitting individuals, i.e. the  
198 more over dispersed, the more likely that disease extinction occurs and the chain of  
199 transmission dies out. However, if an outbreak does result, it is much more explosive than  
200 predicted by  $R_0$ . So, a disease with high over dispersion that does not result in an outbreak  
201 probably lacked the superspreading event. This is where lockdown and social distancing  
202 come in. In addition, this may explain why the introduction of SARS-CoV-2 in France dating  
203 back to December 2019 did not result in an outbreak at that time(20).

204 After 2 weeks, we saw a significant decrease in the average initial diagnostic Ct  
205 ( $P < 0.0001$ ) probably affected by the lockdown, and preventive measures such as mask use,  
206 social distancing and hand hygiene. The decreasing initial diagnostic viral load means that  
207 the identified case probably has a lower burden of disease and is expected to be less  
208 contagious. The highest transmission occurs in the first few days before and after symptom  
209 onset(21), but we also know that around 50% of infections are asymptomatic(22,23). In  
210 addition, the duration of infectivity was thought to last as long as viral shedding continues  
211 early on in the pandemic. We now know that after 11 days, the risk of transmission is  
212 negligible (13,14,24–26). All this contributes to individual viral load variation and  
213 infectivity. A decreasing viral load either indicates an infection with a very low inoculum  
214 after lockdown and cluster containment or a recovering illness.

215 The rapid diagnosis and strict follow up of each emerging cluster within its first week  
216 likely contributed to the containment. We managed to diagnose an average 70% of each  
217 cluster within the first 7 days. By the end of second week, the cluster was almost extinct.  
218 Despite the low Ct indicating a high viral load in cluster G, this cluster died off and did not  
219 lead to further cases. This was more likely a sub cluster from cluster L, hence the  
220 nonuniformity and variation in Ct of cluster L. We believe the drop in average iCt may  
221 signify the appearance of a new case with ability to super spread hence creating an alarm to  
222 test and isolate.

223 Cluster T had 4 cases with a very low average iCt of 16 in 4 individuals on day 1 of  
224 surveillance, yet did not yield any further subclusters. On the other hand, cluster L had 2  
225 cases with a very low average Ct of 16 in 2 individuals on day 6 of surveillance. This  
226 appearance of a low Ct further along the timeline from outbreak onset may have contributed  
227 to the subclusters in cluster L. On the other hand, cluster G, with an average Ct of 17.5 in 2  
228 individuals on 17 of surveillance and 1 individual with Ct 16 on day 34 of surveillance, did  
229 not result in any other cases. This highlights the heterogeneity of transmission in clusters and  
230 how viral load impact is variable depending on the measures taken.

231 Moreover, the cut-off value for a negative PCR differs between laboratories,  
232 manufacturers, and genes tested. A cut-off was suggested at  $Ct > 35$  because above that yields  
233 no viable culture hence no transmissibility(13,27), whereas another found that at  $Ct > 24$  there  
234 is no viable culturable viral RNA(14). Clinically, this is important for treatment of individual  
235 cases. However, epidemiologically, any still traceable amount of DNA is an added, necessary  
236 tool for contact tracing. Upon a novel pathogen outbreak, aggressive contact tracing allows  
237 for a 3-fold more effective targeted control as compared to random control in outbreak  
238 containment(3). It is more thorough than relying on symptom development since a high  
239 proportion will not demonstrate any and may be subjective(22,28). This is unrelated to  
240 clinical status of a patient and is more informative on a larger scale from a public health and  
241 epidemiologic point of view. Thus, we suggest a strict molecular contact tracing as a valid  
242 method of detecting more cases.

243 In our work, we focused mainly on the obtained SARS-CoV-2 PCR results and on  
244 contact tracing details. It was not possible at the time to account for individual genetic  
245 polymorphisms nor genetic predispositions suggested by blood group types. Moreover, to  
246 date, the most accurate tool remains whole genome sequencing to detect clonal outbreaks.  
247 This may have added to the precision of following the evolution of COVID-19 outbreak in  
248 our country.

249 In explosive new epidemics, we must derive from previous experience and not be  
250 blinded by it. In novel emerging pathogens, anticipating heterogeneity in transmission should  
251 be used to plan disease control programs and risk-stratify populations for public health  
252 interventions. Prompt and targeted public health interventions prevent and mitigate  
253 superspreading events and pave the way for a timely interruption of the chain of transmission  
254 during containment. In turn, this reduces the disruption of healthcare services and  
255 society(19). This allows localized, targeted lockdowns and avoids stunting the whole society  
256 on a national and international scale. Performing aggressive molecular contact tracing, using  
257 average initial diagnostic Ct values, and analyzing subsequently the whole genome sequence  
258 of SARS-CoV-2 over time can help us implement the necessary interventions.  
259

## 260 Bibliography

- 261 1. Coronavirus disease 2019 [Internet]. [cited 2020 Apr 21]. Available from:  
262 <https://www.who.int/emergencies/diseases/novel-coronavirus-2019>
- 263 2. Hartfield M, Alizon S. Introducing the Outbreak Threshold in Epidemiology. *PLoS*  
264 *Pathog.* 2013;9(6):9–12.
- 265 3. Zhao S, Lin Q, Ran J, Musa SS, Yang G, Wang W, et al. Preliminary estimation of the  
266 basic reproduction number of novel coronavirus (2019-nCoV) in China, from 2019 to  
267 2020: A data-driven analysis in the early phase of the outbreak. *Int J Infect Dis*  
268 [Internet]. 2020;92:214–7. Available from: <https://doi.org/10.1016/j.ijid.2020.01.050>
- 269 4. Abbott S, Hellewell J, Munday J, Funk S. The transmissibility of novel Coronavirus in  
270 the early stages of the 2019-20 outbreak in Wuhan: Exploring initial point-source  
271 exposure sizes and durations using scenario analysis. *Wellcome Open Res* [Internet].  
272 2020 [cited 2020 Nov 8];5. Available from:  
273 <https://pubmed.ncbi.nlm.nih.gov/32322691/>
- 274 5. Beldomenico PM. Do superspreaders generate new superspreaders? A hypothesis to  
275 explain the propagation pattern of COVID-19. *Int J Infect Dis* [Internet]. 2020;96:461–  
276 3. Available from: <https://doi.org/10.1016/j.ijid.2020.05.025>
- 277 6. Lloyd-Smith JO, Schreiber SJ, Kopp PE, Getz WM. Superspreading and the effect of  
278 individual variation on disease emergence. *Nature.* 2005;438(7066):355–9.
- 279 7. Endo A, Abbott S, Kucharski AJ, Funk S. Estimating the overdispersion in COVID-19  
280 transmission using outbreak sizes outside China [ version 1 ; peer review : awaiting  
281 peer review ] Akira Endo Centre for the Mathematical Modelling of Infectious  
282 Diseases COVID-19 Working. *Science* (80- ). 2020;(May):1–8.
- 283 8. Kwok KO, Ho H, Chan H, Huang Y, Shu D, Hui C, et al. Inferring super-spreading  
284 from transmission clusters of COVID-19 in Hong Kong, Japan and Singapore. *J Hosp*

- 285 Infect [Internet]. 2020; Available from: <https://doi.org/10.1016/j.jhin.2020.05.027>
- 286 9. Furuse Y, Sando E, Tsuchiya N, Miyahara R, Yasuda I, Ko YK, et al. Clusters of  
287 Coronavirus Disease in Communities, Japan, January–April 2020. *Emerg Infect Dis*  
288 [Internet]. 2020 Sep [cited 2020 Sep 7];26(9):2176–9. Available from:  
289 <https://doi.org/10.3201/eid2609.202272>
- 290 10. Regional Preparedness and Response Plan for COVID-19: Republic of Lebanon:  
291 Ministry of Public Health. Repub Lebanon Minist Public Heal [Internet].  
292 2020;2019(March). Available from:  
293 [https://www.moph.gov.lb/userfiles/files/News/LebanCoV Strategic Response Plan](https://www.moph.gov.lb/userfiles/files/News/LebanCoV%20Strategic%20Response%20Plan%20MARCH%202020-converted.pdf)  
294 [MARCH 2020-converted.pdf](https://www.moph.gov.lb/userfiles/files/News/LebanCoV Strategic Response Plan MARCH 2020-converted.pdf)
- 295 11. Khoury P, Azar E, Hitti E. COVID-19 Response in Lebanon: Current Experience and  
296 Challenges in a Low-Resource Setting [Internet]. Vol. 324, *JAMA - Journal of the*  
297 *American Medical Association*. American Medical Association; 2020 [cited 2020 Nov  
298 8]. p. 548–9. Available from: <https://reliefweb.int/report/lebanon/vasyr-2019->
- 299 12. Corman VM, Landt O, Kaiser M, Molenkamp R, Meijer A, Chu DK, et al. Detection  
300 of 2019 novel coronavirus (2019-nCoV) by real-time RT-PCR. *Euro Surveill*.  
301 2020;25(3).
- 302 13. La Scola B, Le Bideau M, Andreani J, Hoang VT, Grimaldier C, Colson P, et al. Viral  
303 RNA load as determined by cell culture as a management tool for discharge of SARS-  
304 CoV-2 patients from infectious disease wards. *Eur J Clin Microbiol Infect Dis* Off  
305 *Publ Eur Soc Clin Microbiol*. 2020;20–2.
- 306 14. Bullard J, Dust K, Funk D, Strong JE, Alexander D, Garnett L, et al. Predicting  
307 infectious SARS-CoV-2 from diagnostic samples. *Clin Infect Dis* [Internet]. 2020 May  
308 22 [cited 2020 Sep 7]; Available from: [https://academic.oup.com/cid/advance-](https://academic.oup.com/cid/advance-article/doi/10.1093/cid/ciaa638/5842165)  
309 [article/doi/10.1093/cid/ciaa638/5842165](https://academic.oup.com/cid/advance-article/doi/10.1093/cid/ciaa638/5842165)

- 310 15. Dehning J, Zierenberg J, Spitzner FP, Wibral M, Neto JP, Wilczek M, et al. Inferring  
311 change points in the COVID-19 spreading reveals the effectiveness of interventions.  
312 Science (80- ) [Internet]. 2020 Apr 2 [cited 2020 Nov 8];369(6500). Available from:  
313 <http://arxiv.org/abs/2004.01105>
- 314 16. Flaxman S, Mishra S, Gandy A, Unwin HJT, Mellan TA, Coupland H, et al.  
315 Estimating the effects of non-pharmaceutical interventions on COVID-19 in Europe.  
316 Nature. 2020;584(7820):257–61.
- 317 17. Zahara de la Sierra and coronavirus: The town that cut itself off from the world - CNN  
318 [Internet]. [cited 2020 Nov 8]. Available from:  
319 [https://edition.cnn.com/2020/04/03/europe/zahara-de-la-sierra-coronavirus-](https://edition.cnn.com/2020/04/03/europe/zahara-de-la-sierra-coronavirus-intl/index.html)  
320 [intl/index.html](https://edition.cnn.com/2020/04/03/europe/zahara-de-la-sierra-coronavirus-intl/index.html)
- 321 18. Italy’s tiny town, spared by virus, attracts scientists [Internet]. [cited 2020 Nov 8].  
322 Available from: [https://www.aa.com.tr/en/europe/italys-tiny-town-spared-by-virus-](https://www.aa.com.tr/en/europe/italys-tiny-town-spared-by-virus-attracts-scientists/1791188)  
323 [attracts-scientists/1791188](https://www.aa.com.tr/en/europe/italys-tiny-town-spared-by-virus-attracts-scientists/1791188)
- 324 19. Frieden TR, Lee CT. Identifying and Interrupting Superspreading Events-Implications  
325 for Control of Severe Acute Respiratory Syndrome Coronavirus 2. Emerg Infect Dis.  
326 2020 Jun 1;26(6):1059–66.
- 327 20. Deslandes A, Berti V, Tandjaoui-Lambotte Y, Alloui C, Carbonnelle E, Zahar JR, et  
328 al. SARS-CoV-2 was already spreading in France in late December 2019. Int J  
329 Antimicrob Agents. 2020 Jun 1;55(6):106006.
- 330 21. He X, Lau EHY, Wu P, Deng X, Wang J, Hao X, et al. Temporal dynamics in viral  
331 shedding and transmissibility of COVID-19. Nat Med. 2020 May 1;26(5):672–5.
- 332 22. Zhou R, Li F, Chen F, Liu H, Zheng J, Lei C, et al. International Journal of Infectious  
333 Diseases Viral dynamics in asymptomatic patients with COVID-19. Int J Infect Dis  
334 [Internet]. 2020;96:288–90. Available from: <https://doi.org/10.1016/j.ijid.2020.05.030>

- 335 23. Bai Y, Yao L, Wei T, Tian F, Jin DY, Chen L, et al. Presumed Asymptomatic Carrier  
336 Transmission of COVID-19. Vol. 323, JAMA - Journal of the American Medical  
337 Association. American Medical Association; 2020. p. 1406–7.
- 338 24. Wölfel R, Corman VM, Guggemos W, Seilmaier M, Zange S, Müller MA, et al.  
339 Virological assessment of hospitalized patients with COVID-2019. Nature.  
340 2020;(March).
- 341 25. Position Statement from the National Centre for Infectious Diseases and the Chapter of  
342 Infectious Disease Physicians Period of Infectivity to Inform Strategies for De-  
343 isolation for COVID-19 Patients. 2020.
- 344 26. HIQA. Health Information and Quality Authority of Ireland: Evidence summary for  
345 COVID-19 viral load over course of infection | HIQA. 2020;(April). Available from:  
346 [https://www.hiqa.ie/reports-and-publications/health-technology-assessment/evidence-](https://www.hiqa.ie/reports-and-publications/health-technology-assessment/evidence-summary-covid-19-viral-load-over)  
347 [summary-covid-19-viral-load-over](https://www.hiqa.ie/reports-and-publications/health-technology-assessment/evidence-summary-covid-19-viral-load-over)
- 348 27. Million M, Lagier J, Gautret P, Colson P, Fournier E, Amrane S, et al. Early treatment  
349 of COVID-19 patients with hydroxychloroquine and azithromycin: A retrospective  
350 analysis of 1061 cases in Marseille, France. Travel Med Infect Dis [Internet].  
351 2020;101738. Available from: <https://doi.org/10.1016/j.tmaid.2020.101738>
- 352 28. Xiao AT, Tong YX, Gao C, Zhu L, Zhang YJ, Zhang S. Dynamic profile of RT-PCR  
353 findings from 301 COVID-19 patients in Wuhan, China: A descriptive study. J Clin  
354 Virol [Internet]. 2020 Jun 1 [cited 2020 Sep 7];127:104346. Available from:  
355 [/pmc/articles/PMC7151472/?report=abstract](https://pubmed.ncbi.nlm.nih.gov/33111111/)

356

Figure 1. Initial Diagnostic Average Ct per week.

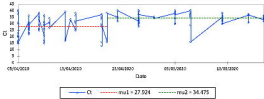



Figure 2: Evolution of Initial Diagnostic SARS-CoV-2 PCR Cycle Number (Ct) Values Throughout Scherrie Outbreak

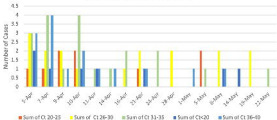

Source: https://www.medrxiv.org/content/medrxiv/early/2020/11/30/2020.11.28.20240077.full.pdf
